# Supplementary material for: Sphingosine-1-phosphate receptors stimulate macrophage plasma-membrane actin assembly via ADP release, ATP synthesis and P2X7R activation
Source: Oxford University Press journal article supplement (doi:10.1242/jcs.034207), 2009-01-28
Supplement: jcs034207-sup-034207-figs3.pdf [file jcs034207-sup-034207-figs3.pdf]

$$\begin{aligned}
 I_{rel}(c) &= \frac{I_{act}(c)}{I_{act}(0.1 \text{ mM ATP}^{4-})} \\
 &= \frac{I_{rel,\infty,1}}{\left(1 + \frac{10^{-\log K_{D1}}}{c}\right)^2} + \frac{I_{rel,\infty,2}}{\left(1 + \frac{10^{-\log K_{D2}}}{c}\right)^2}
 \end{aligned}$$

Fig S3. Modeling of P2X7 receptor affinity for ATP. Approximation of the concentration-dependence of ATP<sup>4-</sup>-evoked currents by a model of two equal high-affinity and two equal low-affinity non-cooperative activating binding sites 11 25. The current *I*<sub>act</sub>(*c*) activated after 6 s application of different concentrations *c* of ATP<sup>4-</sup> or BzTP<sup>4-</sup> was normalized to the respective current at 1 mM ATP<sup>4-</sup> (*I*<sub>act</sub>(0.1 mM ATP<sup>4-</sup>)) to yield *I*<sub>rel</sub>(*c*). *I*<sub>rel,∞,1</sub> and *I*<sub>rel,∞,2</sub> are the maximal relative current components contributing to *I*<sub>rel</sub>(*c*) after saturating at infinite concentrations of the agonist the binding sites with the apparent dissociation constants *K*<sub>D1</sub> and *K*<sub>D2</sub>, respectively. The coefficient of 2 gave higher correlation coefficients than models using one, three or more equal binding sites, respectively. *pK*<sub>D1</sub> = 6.1 ± 1.3 and *pK*<sub>D2</sub> = 3.7 ± 0.1 were calculated.
