# Supplementary material for: Sphingosine-1-phosphate receptors stimulate macrophage plasma-membrane actin assembly via ADP release, ATP synthesis and P2X7R activation
Source: Oxford University Press journal article supplement (doi:10.1242/jcs.034207), 2009-01-28
Supplement: jcs034207-sup-034207-tables1.pdf [file jcs034207-sup-034207-tables1.pdf]

| <b>Drugs</b>       | <b>Effective conc.</b> | <b>Effect on Actin Assembly</b> | <b>Expected Effect on P2X<sub>7</sub>R</b> |
|--------------------|------------------------|---------------------------------|--------------------------------------------|
| bzATP              | 100μM                  | Stimulation                     | Agonist                                    |
| ATP                | 1μM-1mM                | Stimulation                     | Agonist                                    |
| ATP <sub>γ</sub> S | 0.5μM-1mM              | Stimulation                     | Agonist                                    |
| oATP               | 1mM                    | Inhibition                      | Antagonist                                 |
| Coomassie Blue G   | 100nM                  | Inhibition                      | Antagonist                                 |
| KN62               | 100μM                  | Inhibition                      | Antagonist                                 |

Table S1: Effects of known antagonists and agonists of P2X<sub>7</sub> Receptor on actin assembly at 5 seconds by RAW macrophages
