# Supplementary figures and images for: Sphingosine-1-phosphate receptors stimulate macrophage plasma-membrane actin assembly via ADP release, ATP synthesis and P2X7R activation
Source: Oxford University Press journal article supplement (doi:10.1242/jcs.034207), 2009-01-28

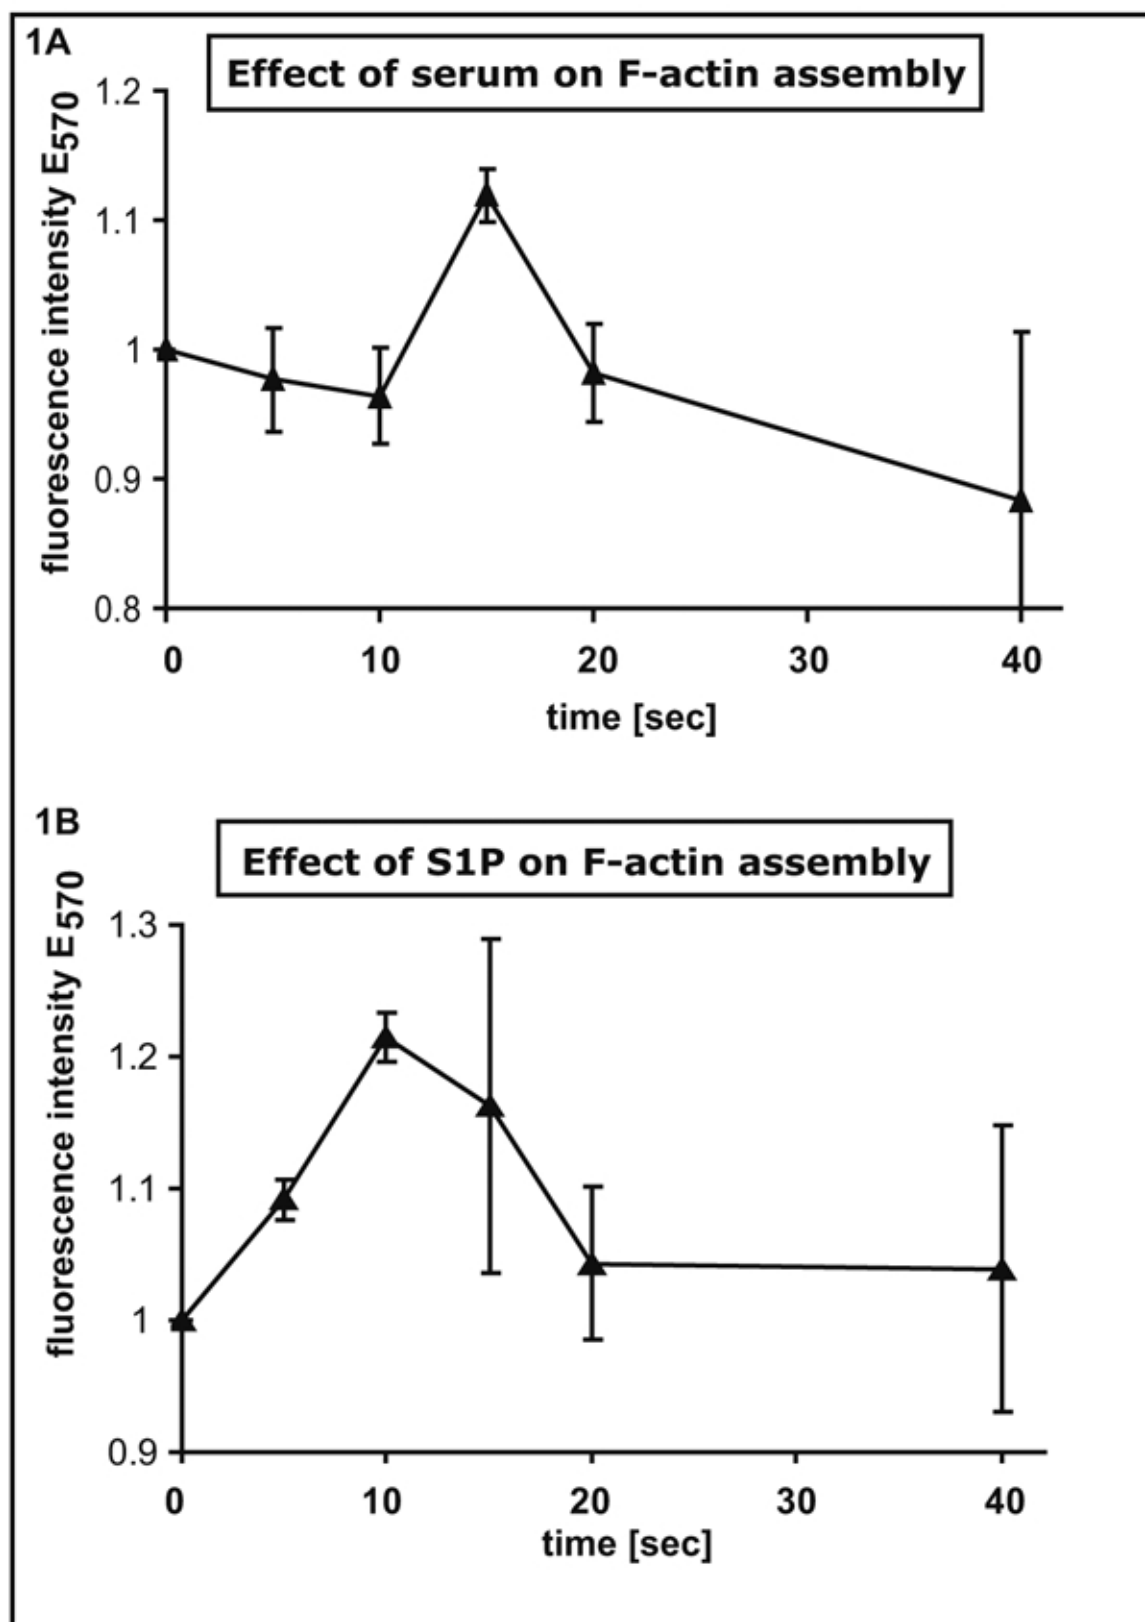

Figure S1: Effects of Serum and 10nm S1P on Actin assembly

Supplement: jcs034207-sup-034207-figs1.pdf [file jcs034207-sup-034207-figs1.pdf]

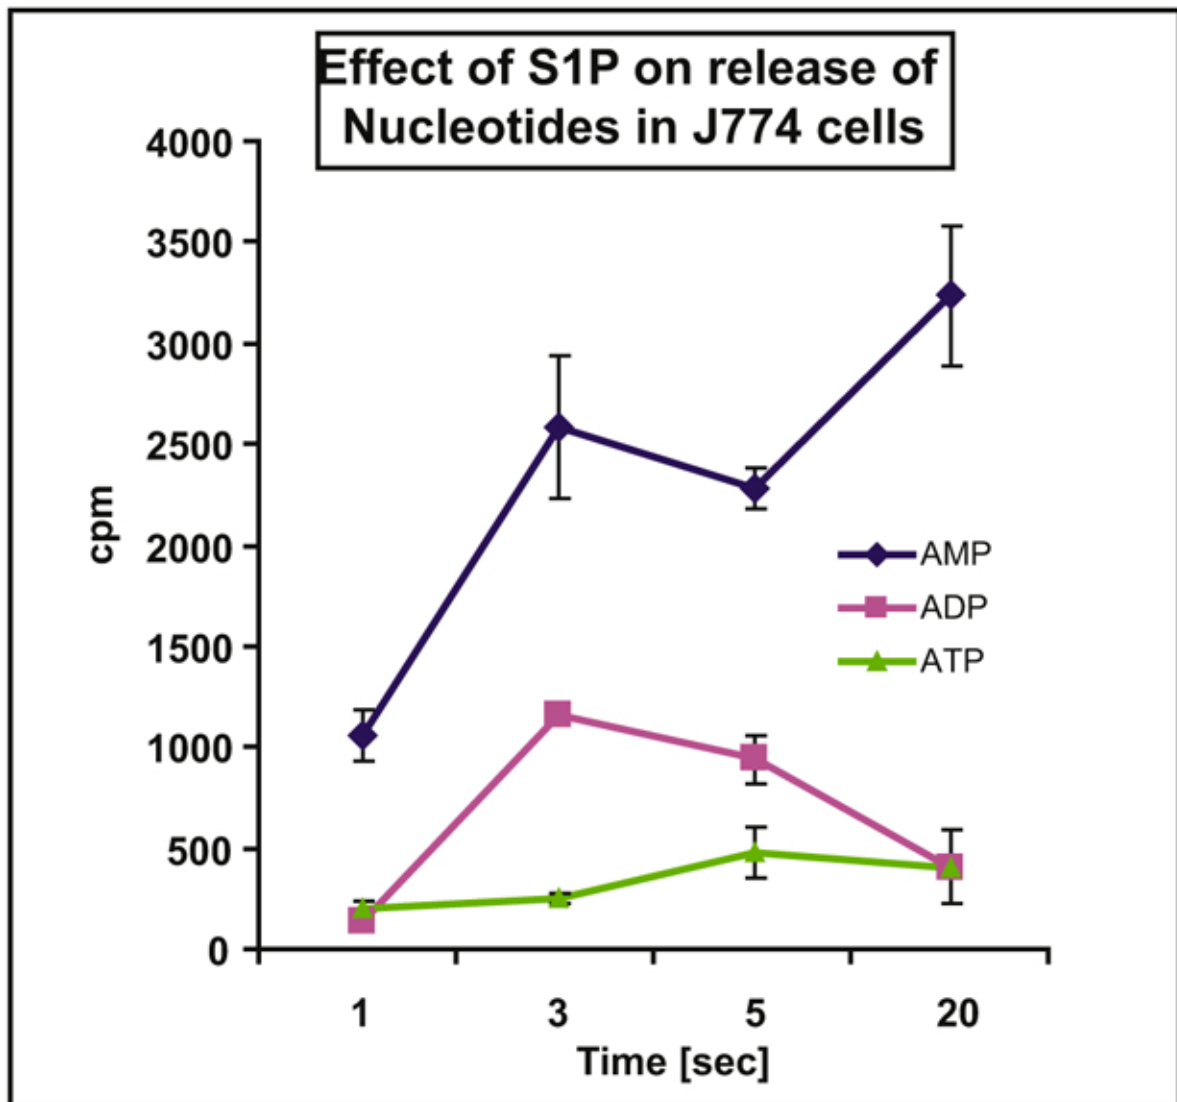

Fig S2: Secretion of labelled nucleotides by J774 macrophages in response to 100nM S1P

Supplement: jcs034207-sup-034207-figs2.pdf [file jcs034207-sup-034207-figs2.pdf]
